# Supplementary material for: Modeling of magnesium-decorated graphene quantum dot nanostructure for trapping AsH3, PH3and NH3gases
Source: Royal Society of Chemistry journal article supplement (doi:10.1039/d3ra01279d), 2023-01-01
Supplement: d3ra01279d1.pdf [file d3ra01279d1.pdf]

# **Modeling of Magnesium decorated graphene quantum dot nanostructured for trapping AsH<sub>3</sub>, PH<sub>3</sub> and NH<sub>3</sub> gases**

**Ernest C. Agwamba <sup>a,d\*</sup>, Hitler Louis <sup>a,b\*\*</sup>, Praise O. Olagoke <sup>a</sup>, Terkumbur E. Gber <sup>a,b</sup>  
Gideon .A. Okon, Chidera F. Fidelis <sup>a,b</sup>, and Adedapo S. Adeyinka <sup>e</sup>**

<sup>a</sup>Computational and Bio-Simulation Research Group, University of Calabar, Calabar, Nigeria

<sup>b</sup>Department of Pure and Applied Chemistry, Faculty of Physical Sciences, University of Calabar, Calabar, Nigeria

<sup>c</sup> Department of Chemistry, Covenant University, Ota, Nigeria

<sup>d</sup>Department of Chemical Sciences, University of Johannesburg, Johannesburg, South-Africa

**\*Corresponding authors' email: [Agwamba.Ernest@gmail.com](mailto:Agwamba.Ernest@gmail.com) and [gberterkumburemanuel@gmail.com](mailto:gberterkumburemanuel@gmail.com)**

TABLE S1. Thermodynamic parameters of the optimized structures including the Enthalpy and Gibbs free energy in Benzene phase

| PARAMETERS                    | C <sub>24</sub> H <sub>12</sub> -Mg_benz | AsH <sub>3</sub> _benz | AsH <sub>3</sub> @C <sub>24</sub> H <sub>12</sub> -Mg_benz | NH <sub>3</sub> _benz | NH <sub>3</sub> @C <sub>24</sub> H <sub>12</sub> -Mg_benz | PH <sub>3</sub> _benz | PH <sub>3</sub> @C <sub>24</sub> H <sub>12</sub> .Mg_benz |
|-------------------------------|------------------------------------------|------------------------|------------------------------------------------------------|-----------------------|-----------------------------------------------------------|-----------------------|-----------------------------------------------------------|
| $\epsilon_0$                  | -1121.876                                | -2235.823              | -3359.575                                                  | -56.567               | -1178.449                                                 | -343.151              | -1465.034                                                 |
| $\epsilon_{ZPE}$              | 0.283                                    | 0.020                  | 0.306                                                      | 0.035                 | 0.319                                                     | 0.024                 | 0.308                                                     |
| $E_{tot}$                     | 0.299                                    | 0.023                  | 0.327                                                      | 0.037                 | 0.339                                                     | 0.027                 | 0.329                                                     |
| $H_{corr}$                    | 0.300                                    | 0.024                  | 0.328                                                      | 0.038                 | 0.340                                                     | 0.028                 | 0.330                                                     |
| $G_{corr}$                    | 0.237                                    | -0.000                 | 0.252                                                      | 0.016                 | 0.266                                                     | 0.003                 | 0.255                                                     |
| $\epsilon_0 + \epsilon_{ZPE}$ | -1121.593                                | -2235.803              | -3359.268                                                  | -56.532               | -1178.130                                                 | -343.127              | -1465.726                                                 |
| $\epsilon_0 + E_{tot}$        | -1121.577                                | -2235.800              | -3359.247                                                  | -56.529               | -1178.110                                                 | -343.124              | -1465.705                                                 |
| $\epsilon_0 + H_{corr}$       | -1121.576                                | -2235.799              | -3359.246                                                  | -56.528               | -1178.109                                                 | -343.123              | -1465.704                                                 |
| $\epsilon_0 + G_{corr}$       | -1121.639                                | -2235.823              | -3359.323                                                  | -56.551               | -1178.183                                                 | -343.148              | -1465.779                                                 |
| $\Delta_f H^*(298K)$          |                                          |                        | -1.871                                                     |                       | -0.005                                                    |                       | -1.005                                                    |
| $\Delta_f G^*(298)$           |                                          |                        | -1.861                                                     |                       | 0.007                                                     |                       | -0.992                                                    |

| PARAMETERS                    | C <sub>24</sub> H <sub>12</sub> -Mg_EtOH | AsH <sub>3</sub> _EtOH | AsH <sub>3</sub> @C <sub>24</sub> H <sub>12</sub> -Mg_EtOH | NH <sub>3</sub> _EtOH | NH <sub>3</sub> @C <sub>24</sub> H <sub>12</sub> -Mg_EtOH | PH <sub>3</sub> _EtOH | PH <sub>3</sub> @C <sub>24</sub> H <sub>12</sub> -Mg_EtOH |
|-------------------------------|------------------------------------------|------------------------|------------------------------------------------------------|-----------------------|-----------------------------------------------------------|-----------------------|-----------------------------------------------------------|
| $\epsilon_0$                  | -1121.885                                | -2235.827              | -3359.584                                                  | -56.569               | -1178.460                                                 | -343.151              | -1465.044                                                 |
| $\epsilon_{ZPE}$              | 0.283                                    | 0.020                  | 0.306                                                      | 0.035                 | 0.318                                                     | 0.024                 | 0.309                                                     |
| $E_{tot}$                     | 0.299                                    | 0.023                  | 0.327                                                      | 0.037                 | 0.338                                                     | 0.027                 | 0.329                                                     |
| $H_{corr}$                    | 0.300                                    | 0.024                  | 0.328                                                      | 0.038                 | 0.339                                                     | 0.028                 | 0.330                                                     |
| $G_{corr}$                    | 0.237                                    | -0.000                 | 0.252                                                      | 0.016                 | 0.265                                                     | 0.003                 | 0.255                                                     |
| $\epsilon_0 + \epsilon_{ZPE}$ | -1121.603                                | -2235.806              | -3359.278                                                  | -56.535               | -1178.142                                                 | -343.127              | -1464.735                                                 |
| $\epsilon_0 + E_{tot}$        | -1121.586                                | -2235.804              | -3359.257                                                  | -56.532               | -1178.122                                                 | -343.124              | -1464.714                                                 |
| $\epsilon_0 + H_{corr}$       | -1121.585                                | -2235.803              | -3359.256                                                  | -56.531               | -1178.121                                                 | -343.123              | -1464.714                                                 |
| $\epsilon_0 + G_{corr}$       | -1121.649                                | -2235.827              | -3359.332                                                  | -56.554               | -1178.195                                                 | -343.148              | -1464.789                                                 |
| $\Delta_f H^*(298K)$          |                                          |                        | -1.876                                                     |                       | -0.005                                                    |                       | -0.006                                                    |
| $\Delta_f G^*(298)$           |                                          |                        | 1.856                                                      |                       | -0.015                                                    |                       | 0.008                                                     |

TABLE S2. Thermodynamic parameters of the optimized structures including the Enthalpy and Gibbs free energy in Ethanol phase

| PARAMETERS                           | C <sub>24</sub> H <sub>12</sub> -Mg_H <sub>2</sub> O | AsH <sub>3</sub> _H <sub>2</sub> O | AsH <sub>3</sub> @C <sub>24</sub> H <sub>12</sub> -Mg_H <sub>2</sub> O | NH <sub>3</sub> _H <sub>2</sub> O | NH <sub>3</sub> @C <sub>24</sub> H <sub>12</sub> -Mg_H <sub>2</sub> O | PH <sub>3</sub> _H <sub>2</sub> O | PH <sub>3</sub> @C <sub>24</sub> H <sub>12</sub> -Mg_H <sub>2</sub> O |
|--------------------------------------|------------------------------------------------------|------------------------------------|------------------------------------------------------------------------|-----------------------------------|-----------------------------------------------------------------------|-----------------------------------|-----------------------------------------------------------------------|
| $\epsilon_0$                         | -1121.886                                            | -2235.825                          | -3359.585                                                              | -56.570                           | -1178.461                                                             | -343.151                          | -1465.045                                                             |
| $\epsilon_{\text{ZPE}}$              | 0.283                                                | 0.020                              | 0.306                                                                  | 0.035                             | 0.319                                                                 | 0.024                             | 0.309                                                                 |
| $E_{\text{tot}}$                     | 0.299                                                | 0.023                              | 0.327                                                                  | 0.037                             | 0.339                                                                 | 0.027                             | 0.329                                                                 |
| $H_{\text{corr}}$                    | 0.300                                                | 0.024                              | 0.328                                                                  | 0.038                             | 0.340                                                                 | 0.028                             | 0.330                                                                 |
| $G_{\text{corr}}$                    | 0.236                                                | -0.000                             | 0.252                                                                  | 0.016                             | 0.265                                                                 | 0.003                             | 0.255                                                                 |
| $\epsilon_0 + \epsilon_{\text{ZPE}}$ | -1121.603                                            | -2235.805                          | -3359.279                                                              | -56.535                           | -1178.143                                                             | -343.127                          | -1465.736                                                             |
| $\epsilon_0 + E_{\text{tot}}$        | -1121.587                                            | -2235.802                          | -3359.258                                                              | -56.532                           | -1178.122                                                             | -343.124                          | -1465.715                                                             |
| $\epsilon_0 + H_{\text{corr}}$       | -1121.586                                            | -2235.801                          | -3359.257                                                              | -56.531                           | -1178.121                                                             | -343.123                          | -1465.714                                                             |
| $\epsilon_0 + G_{\text{corr}}$       | -1121.650                                            | -2235.826                          | -3359.333                                                              | -56.554                           | -1178.196                                                             | -343.148                          | -1465.790                                                             |
| $\Delta_f H^*(298\text{K})$          |                                                      |                                    | -1.870                                                                 |                                   | -0.004                                                                |                                   | -1.005                                                                |
| $\Delta_f G^*(298)$                  |                                                      |                                    | -1.857                                                                 |                                   | 0.008                                                                 |                                   | -0.992                                                                |

TABLE S3. Thermodynamic parameters of the optimized structures including the Enthalpy and Gibbs free energy in Water phase.
